# Supplementary material for: Mapping the dynamics of force transduction at cell–cell junctions of epithelial clusters
Source: eLife journal article supplement (doi:10.7554/elife.03282), 2014-12-05
Supplement: supp [file elife-03282-supp-v1.zip]

Archive with 10 entries (10 files):
- elife_poa_e03282_Figure_3_Figure_Supplement_1.pdf
- elife_poa_e03282_Figure_9_Figure_Supplement_1.pdf
- elife_poa_e03282_Figure_6_Figure_Supplement_1.pdf
- elife_poa_e03282_Video_5.mov
- elife_poa_e03282_Figure_4_Figure_Supplement_1.pdf
- elife_poa_e03282_Video_2.mov
- elife_poa_e03282_Figure_6_Figure_Supplement_2.pdf
- elife_poa_e03282_Video_4.mov
- elife_poa_e03282_Video_3.mov
- elife_poa_e03282_Video_1.mov
