# Supplementary figures and images for: Mapping the dynamics of force transduction at cell–cell junctions of epithelial clusters
Source: eLife journal article supplement (doi:10.7554/elife.03282), 2014-12-05

**Figure 3 - Supplemental Figure 1**

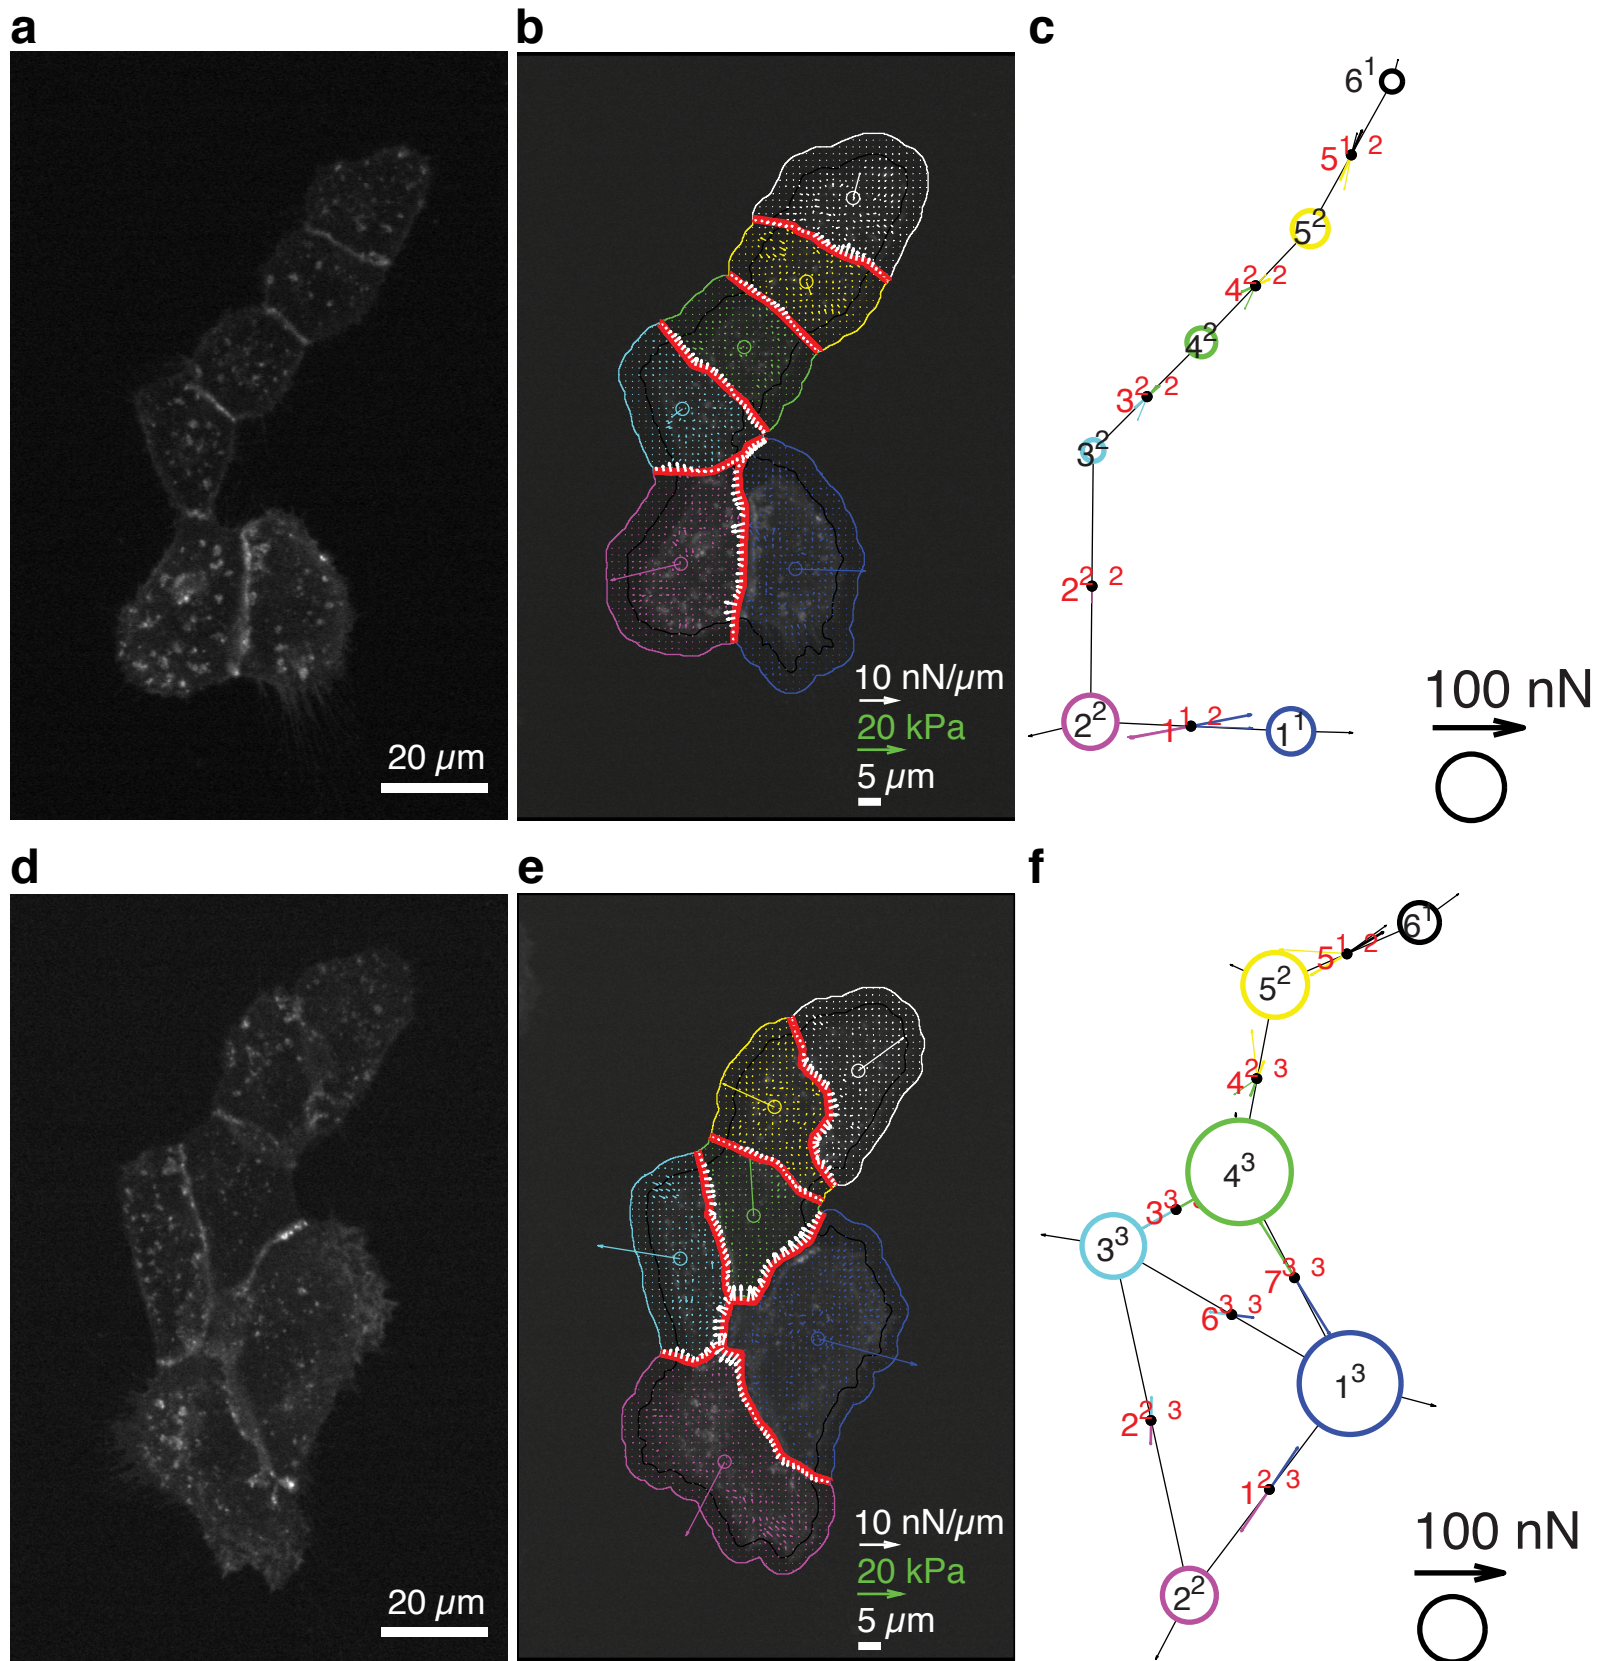

Supplement: supp [file elife-03282-supp-v1.zip › elife_poa_e03282_Figure_3_Figure_Supplement_1.pdf]

Figure 9- Supplementary Figure 1

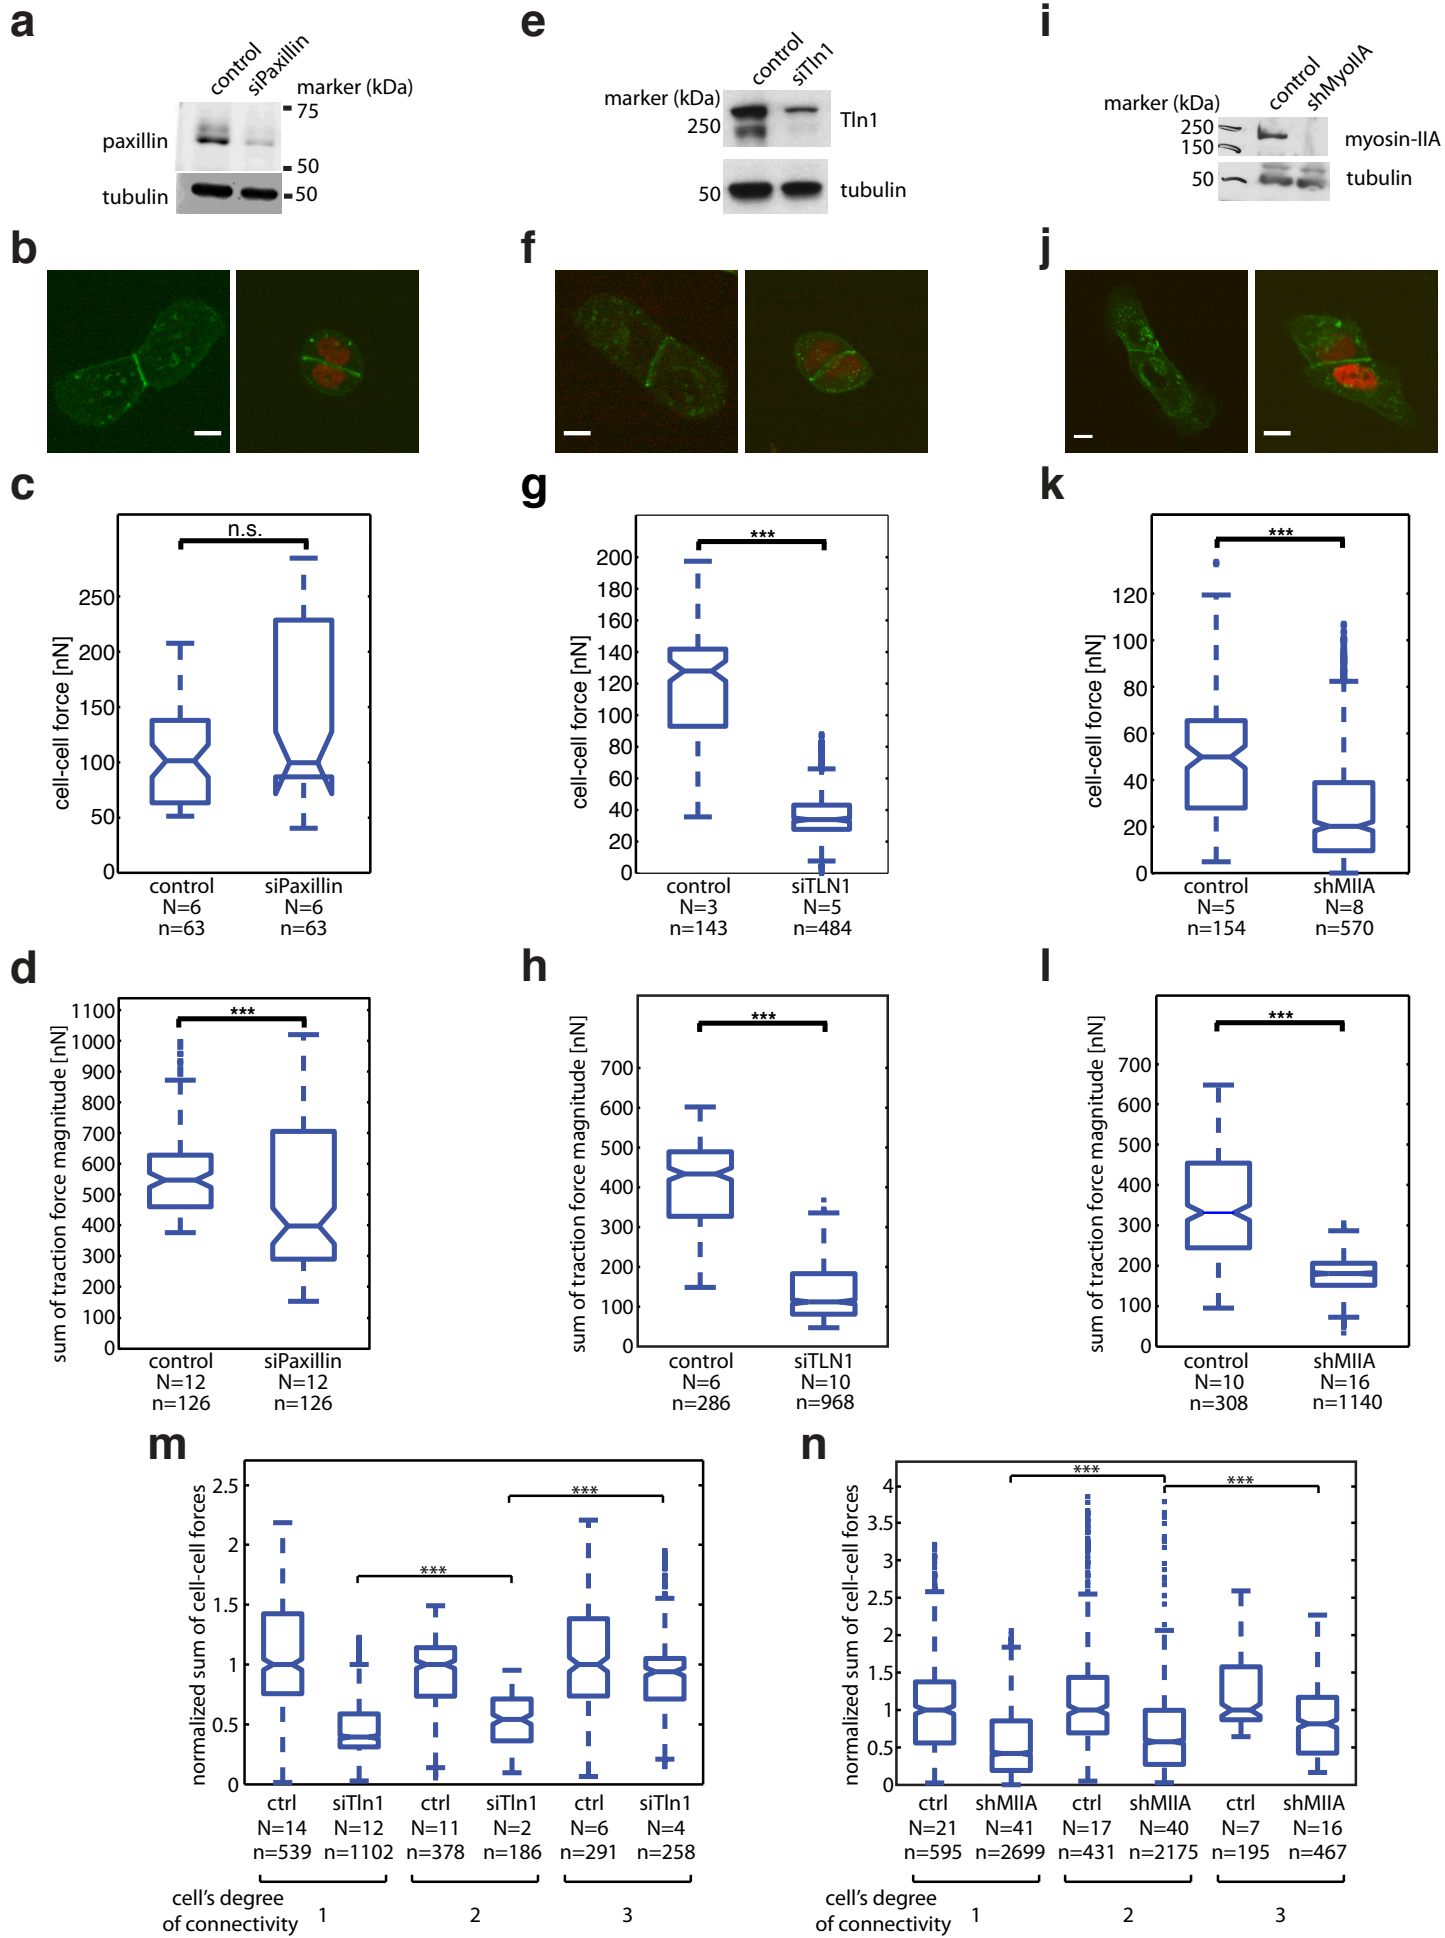

Supplement: supp [file elife-03282-supp-v1.zip › elife_poa_e03282_Figure_9_Figure_Supplement_1.pdf]

Figure 6 - Supplementary Figure 1

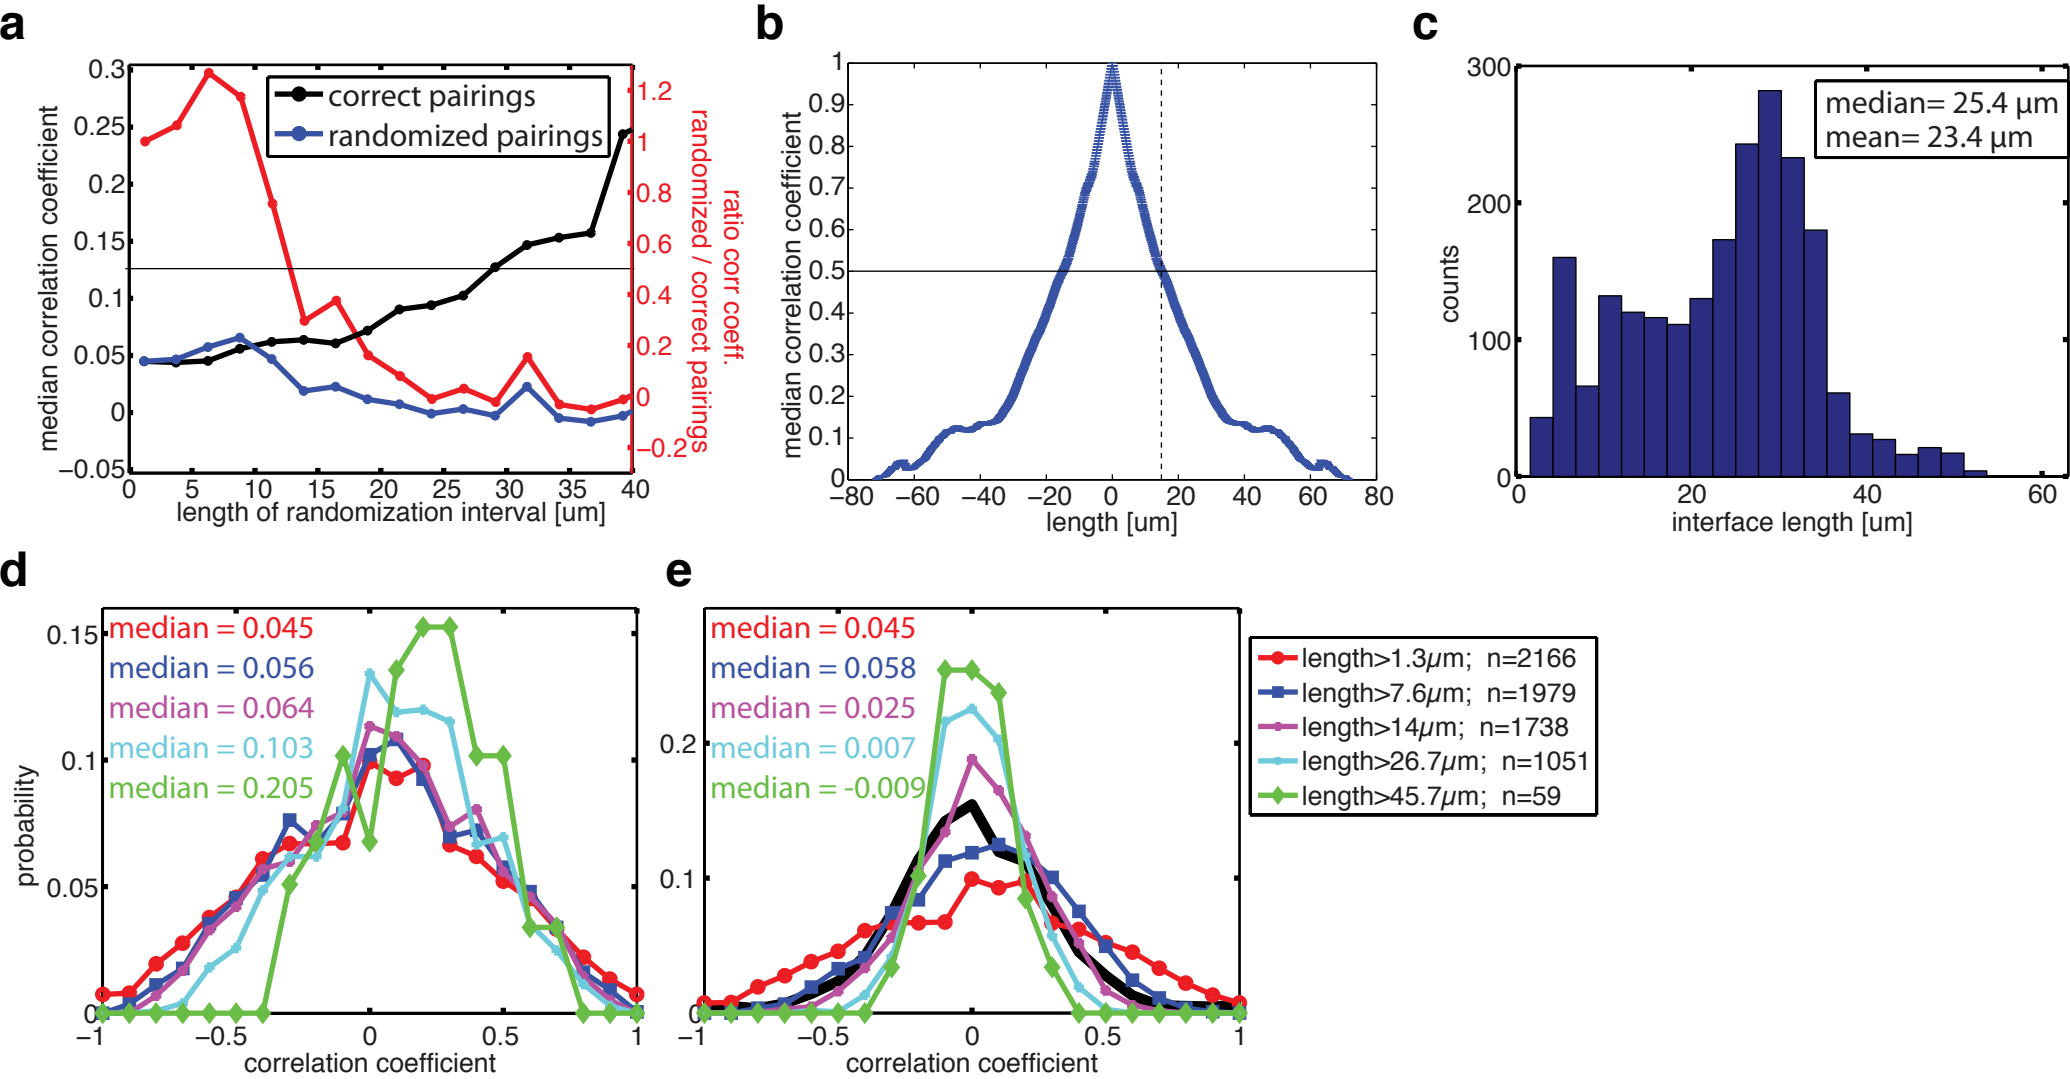

Supplement: supp [file elife-03282-supp-v1.zip › elife_poa_e03282_Figure_6_Figure_Supplement_1.pdf]

Figure 4 - Supplementary Figure 1

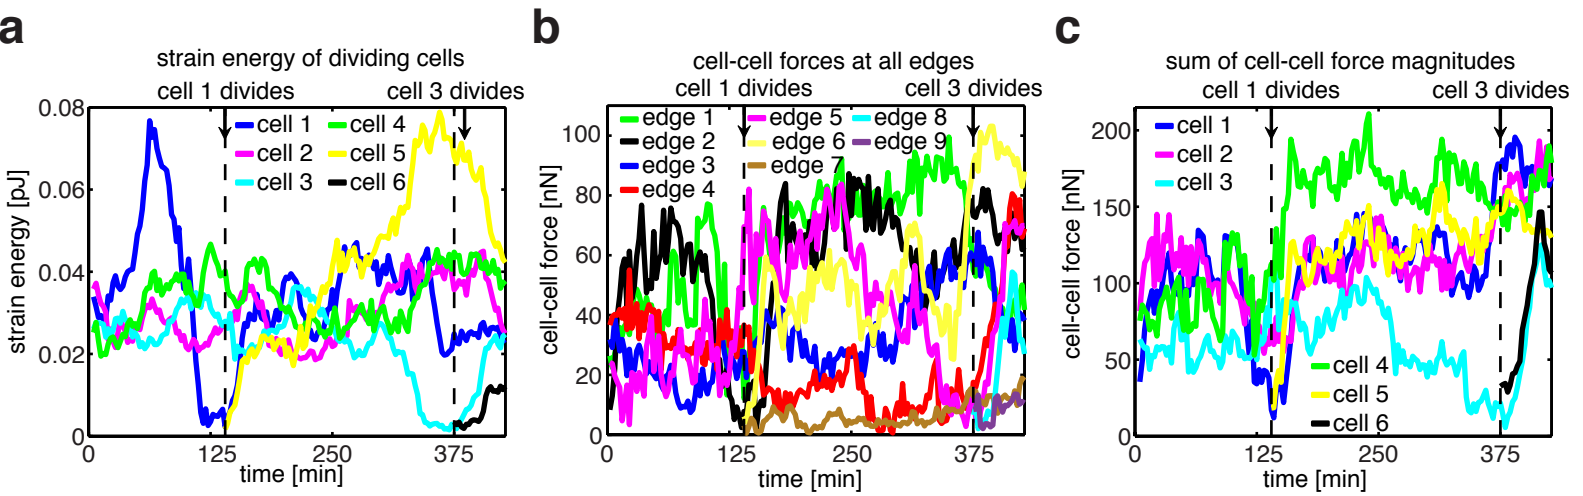

Supplement: supp [file elife-03282-supp-v1.zip › elife_poa_e03282_Figure_4_Figure_Supplement_1.pdf]

**Figure 6 - Supplemental Figure 2**

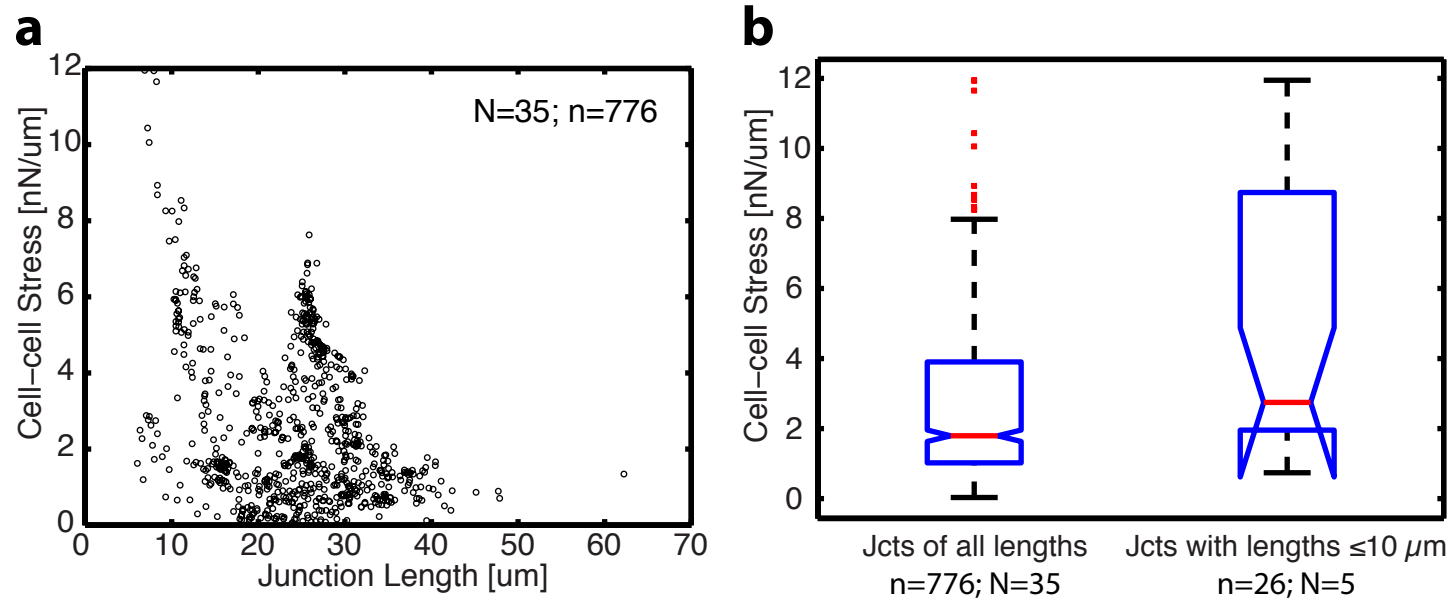

Supplement: supp [file elife-03282-supp-v1.zip › elife_poa_e03282_Figure_6_Figure_Supplement_2.pdf]
